# Supplementary material
Source: PubMed Central journal article supplement (PMC7722604)
Supplement: mmc1.pdf [file mmc1.pdf]

SUPPLEMENTARY MATERIAL

# Optimizing analytical methods to detect SARS-CoV-2 in wastewater.

Alba Pérez-Cataluña<sup>1δ</sup>, Enric Cuevas-Ferrando<sup>1δ</sup>, Walter Randazzo<sup>1,2</sup>, Irene Falcó<sup>1</sup>, Ana Allende<sup>3</sup>, Gloria Sánchez<sup>1\*</sup>

<sup>1</sup>Department of Preservation and Food Safety Technologies, Institute of Agrochemistry and Food Technology, IATA-CSIC, Av. Agustín Escardino 7, Paterna, 46980, Valencia, Spain;

<sup>2</sup>Department of Microbiology and Ecology, University of Valencia, Av. Dr. Moliner, 50, Burjassot, 46100 Valencia, Spain.

<sup>3</sup>Research Group on Quality, Safety and Bioactivity of Plant Foods, Department of Food Science and Technology, CEBAS-CSIC, Campus Universitario de Espinardo, 25, 30100, Murcia, Spain.

Figure S1. Standard curves for targets N1, N2 and gene E performed with 10-fold dilutions ( $10^0$ - $10^6$  gc/reaction) of the genomic RNA (ATCC VR-1986D) and the synthetic plasmids of genes N (IDT 10006625) and E (IDT 10006896). For each gene and standard material, slope and  $R^2$  are shown.

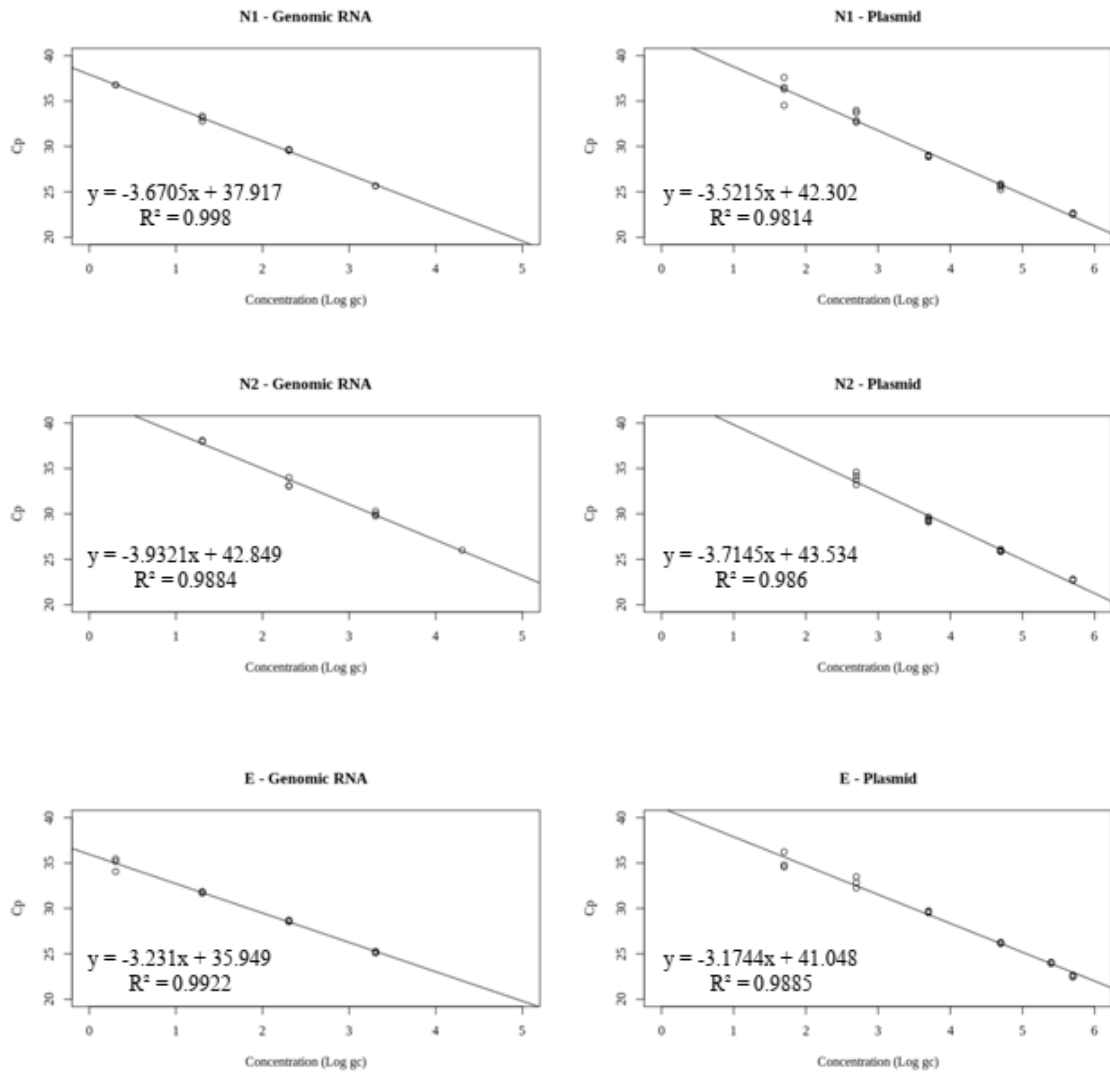

Table S1. Reaction mix volumes (in  $\mu\text{l}$ ) used for the detection of SARS-CoV-2 by RT-qPCR. Reagents: Buffer, 2X One Step RT-PCR Buffer III; Enzyme 1, Takara Ex Taq HS (5u/  $\mu\text{l}$ ); Enzyme 2, PrimeScript RT enzyme Mix II. Total RNA volume of 2.5  $\mu\text{l}$ . Water was added to a final reaction volume of 10  $\mu\text{l}$ .

| Target           | Buffer | Enzyme |     | Forward primer    | Reverse primer   | Probe            |
|------------------|--------|--------|-----|-------------------|------------------|------------------|
|                  |        | 1      | 2   |                   |                  |                  |
| <b>N1, N2</b>    | 5      | 0.2    | 0.2 | 0.75 <sup>a</sup> |                  |                  |
| <b>E</b>         | 5      | 0.2    | 0.2 | 0.5 <sup>a</sup>  |                  |                  |
| <b>IP4</b>       | 5      | 0.2    | 0.2 | 0.4 <sup>b</sup>  | 0.4 <sup>b</sup> | 0.2 <sup>b</sup> |
| <b>MgV, PEDV</b> | 5      | 0.2    | 0.2 | 0.5 <sup>b</sup>  | 0.5 <sup>b</sup> | 0.5 <sup>b</sup> |

<sup>a</sup> Primers at 400nM final concentration; Probes at 200nM final concentration. Primers and probes premixed in commercial kits from IDT Technologies.

<sup>b</sup> From stock with an initial concentration of 10  $\mu\text{M}$ .

Table S2. Thermal amplification conditions for the RT-qPCR used in the study for the detection of SARS-CoV-2, MgV and PEDV.

| Target             | Retrotranscription | Activation  | Denaturation | Annealing                    | Cycles |
|--------------------|--------------------|-------------|--------------|------------------------------|--------|
| <b>N1, N2</b>      | 50°C, 15 min       | 95°C, 2 min | 95°C, 3 sec  | 55°C, 30 sec                 | 45     |
| <b>IP2, IP4, E</b> | 55°C, 20 min       | 95°C, 3 min | 95°C, 15 sec | 58°C, 30 sec                 | 50     |
| <b>MgV, PEDV</b>   | 55°C, 15 min       | 95°C, 5 min | 95°C, 5 sec  | 60°C, 10 sec<br>65°C, 10 sec | 45     |

Table S3. Primers and probes used for the detection of SARS-CoV-2, PEDV and MgV.

| <b>Virus</b>      | <b>Target</b> | <b>Name</b>          | <b>Sequences (5' – 3')</b>         | <b>Amplicon size (bp)</b> | <b>Reference</b>  |                     |
|-------------------|---------------|----------------------|------------------------------------|---------------------------|-------------------|---------------------|
| <b>SARS-CoV-2</b> | N1            | USCDC_N1_F           | GACCCCAAATCAGCGAAAT                | 72                        |                   |                     |
|                   |               | USCDC_N1_P           | FAM-ACCCCGCATTACGTTTGGTGGACC-BHQ1  |                           |                   |                     |
|                   |               | USCDC_N1_R           | TCTGGTACTGCCAGTTGAATCTG            |                           |                   |                     |
|                   | N2            | USCDC_N2_F           | TTACAAACATTGGCCGCAA                | 67                        |                   |                     |
|                   |               | USCDC_N2_P           | FAM-ACAATTTGCCCCAGCGCTTCAG-BHQ1    |                           |                   |                     |
|                   |               | USCDC_N2_R           | GCGCGACATTCCGAAGAA                 |                           |                   |                     |
|                   | E             | Charité_E_F          | ACAGGTACGTAAATAGTTAATAGCGT         | 113                       |                   |                     |
|                   |               | Charité_E_P          | FAM-ACACTAGCCATCCTTACTGCGCTTCG-BBQ |                           |                   | Corman et al., 2020 |
|                   |               | Charité_E_R          | ATATTGCAGCAGTACGCACACA             |                           |                   |                     |
|                   | IP2           | Pasteur_IP2_F        | ATGAGCTTAGTCCTGTTG                 | 108                       |                   |                     |
|                   |               | Pasteur_IP2_P        | FAM-AGATGTCTTGTGCTGCCGGTA-BHQ1     |                           |                   |                     |
|                   |               | Pasteur_IP2_R        | CTCCCTTTGTTGTGTTGT                 |                           |                   |                     |
|                   | IP4           | Pasteur_IP4_F        | GGTAACTGGTATGATTTTCG               | 107                       |                   |                     |
|                   |               | Pasteur_IP4_P        | FAM-TCATACAAACCACGCCAGG-BHQ1       |                           |                   |                     |
| Pasteur_IP4_R     |               | CTGGTCAAGGTTAATATAGG |                                    |                           |                   |                     |
| <b>PEDV</b>       | M gene        | PEDV_forward         | CAGGACACATTCTTGGTGGTCTT            | 140                       | Zhou et al., 2017 |                     |
|                   |               | PEDV_probe           | FAM-ACGCGCTTCTCACTAC-MGBNFQ        |                           |                   |                     |
|                   |               | PEDV_reverse         | CAAGCAATGTACCACTAAGGAGTGTT         |                           |                   |                     |
| <b>MgV</b>        | 5' NCR        | Mengo 110            | GCGGGTCCTGCCGAAAGT                 | 100                       | ISO 15216-1:2017  |                     |
|                   |               | Mengo probe          | FAM-ATCACATTACTGGCCGAAGC-MGBNFQ    |                           |                   |                     |
|                   |               | Mengo 209            | GAAGTAACATATAGACAGACGCACAC         |                           |                   |                     |

Table S4. Detection by RT-qPCR of SARS-CoV-2 in sewage samples targeting N1 region.  
 Abbreviations: MN, NucleoSpin RNA virus kit (Macherey-Nagel GmbH & Co.); Max,  
 Maxwell RSC (Promega); Ct, RT-qPCR cycle threshold.

| <b>Sample</b>    | <b>MN (Ct)</b> |       | <b>Maxwell (Ct)</b> |       |
|------------------|----------------|-------|---------------------|-------|
| <b>Sample 1</b>  | 36.50          | 35.77 | 34.53               | 35.18 |
| <b>Sample 2</b>  | -              | -     | -                   | 36.14 |
| <b>Sample 3</b>  | -              | -     | 32.34               | 32.02 |
| <b>Sample 4</b>  | 34.95          | 35.54 | 36.29               | 35.76 |
| <b>Sample 5</b>  | 37.05          | -     | 35.78               | 35.71 |
| <b>Sample 6</b>  | -              | 36.61 | 34.96               | 35.96 |
| <b>Sample 7</b>  | 39.31          | 39.42 | 33.99               | 34.62 |
| <b>Sample 8</b>  | 40.00          | 40.00 | 37.14               | 38.8  |
| <b>Sample 9</b>  | 38.32          | -     | 37.04               | -     |
| <b>Sample 10</b> | 36.93          | 36.83 | 36.77               | 35.7  |
| <b>Sample 11</b> | 39.14          | -     | 37.65               | 36.84 |

## References

Zhou, X.; Zhang, T.; Song, D.; Huang, T.; Peng, Q.; Chen, Y.; Li, A.; Zhang, F.; Wu, Q.; Ye, Y.; Tang, Y., Comparison and evaluation of conventional RT-PCR, SYBR green I and TaqMan real-time RT-PCR assays for the detection of porcine epidemic diarrhea virus. *Mol. Cell. Probes* 33 (2017) 36–41 10.1016/j.mcp.2017.02.002.
